# Supplementary material for: The Role of Farnesoid X Receptor in Accelerated Liver Regeneration in Rats Subjected to ALPPS
Source: MDPI journal article supplement (doi:10.3390/curroncol28060438), 2021-12-09
Supplement: s1 [file s1]

# The Role of Farnesoid X Receptor in Accelerated Liver Regeneration in Rats Subjected to ALPPS

Noemi Daradics, Pim B. Olthof, Andras Budai, Michal Heger, Thomas M. van Gulik, Andras Fulop and Attila Szijarto

Table S1. qRT-PCR primers

| Target               | Forward (5' → 3')         | Reverse (5' → 3')       |
|----------------------|---------------------------|-------------------------|
| <i>Cyp7a1</i> (RML)  | GCAGCCTCTGAAGAAGTGAG-TGG  | GATGCTGTCTAGTACCGGCAGG  |
| <i>Ntcp</i> (RML)    | TGAACCTCAG-CATCGTGATGACC  | GGACGATCCCTATGGTGCAAGG  |
| <i>Mrp3</i> (RML)    | ATGCTGGCCAAAATGCGGTTGC    | CCAGGAGCCCTTGCAGTATTCC  |
| <i>Bsep</i> (RML)    | CTCTGCTTTGCCTTTTCCAGG     | AGAGACCACCCTGAAAACGTGG  |
| <i>Mrp2</i> (RML)    | GAGTCTGAG-GATGAATCTCGACC  | TGCCCTATGCTCAGGTTGTCACC |
| <i>Fxr</i> (RML; I)  | GTCATCCTCTCTCCAGACAG-ACA  | GGTTGAATGTCCGGAGTTCTGTC |
| <i>Shp</i> (RML; I)  | GCTAGAGGAACCCAACAGTGGT    | CCTGGCACATCTGGGTTGAAGA  |
| <i>B2m</i> (RML)     | CCACCGGAGAAATGGGAAGCCC    | TCTCGGTCCCAGGTGACGGT    |
| <i>Foxm1</i> (RML)   | AGGCGCCCTCAAGAGCATCA      | TGGTGCCAACACTTCCAGCCT   |
| <i>Fgfr4</i> (RML)   | AGCTCCAGGCGGGTGAGTGT      | CGCTGACCACCTTCCTGGCT    |
| <i>Fgf15</i> (I)     | AGGGCCAGAAACCTTCAAAC      | GATCCATGCTGTGCTGCTCTC   |
| <i>Oatp1a4</i> (RML) | CTCTTATGAAGGGGTTTCAG-CACC | CAAGGCAGGCTGACATGTATGC  |

RML: right median lobe of the liver, I: identical part of the ileal tract.

## Liver mass of the ligated lobes

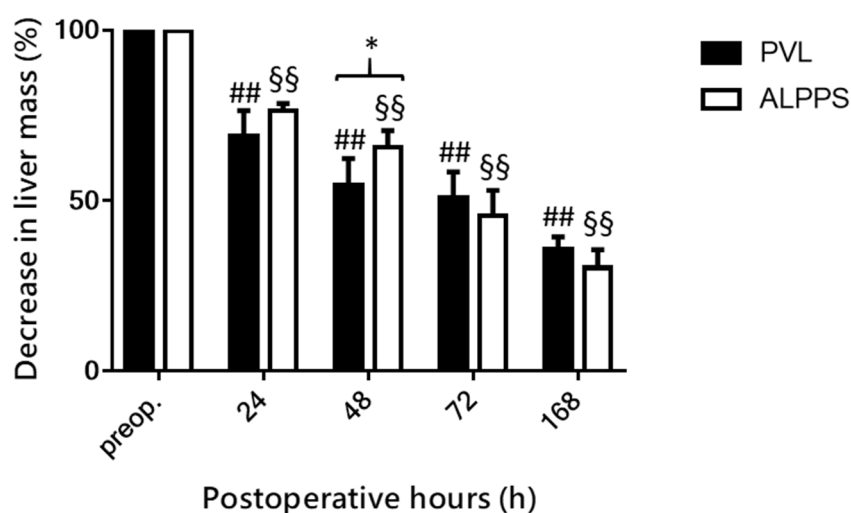

**Figure S1.** Rate of atrophy. Decrease in liver mass of the atrophying liver lobes preoperatively (preop.) and at 24 h, 48 h, 72 h, and 168 h after portal vein ligation (PVL) versus associating liver partition and portal vein ligation for staged hepatectomy (ALPPS) (N = 6 per time point per group).

\*  $P < 0.05$  versus PVL; ##  $P < 0.001$  PVL versus corresponding controls (preop.); §§  $P < 0.0010$  ALPPS versus corresponding controls (preop.). Statistical analysis was performed with a two-way ANOVA and Tukey's post hoc test.

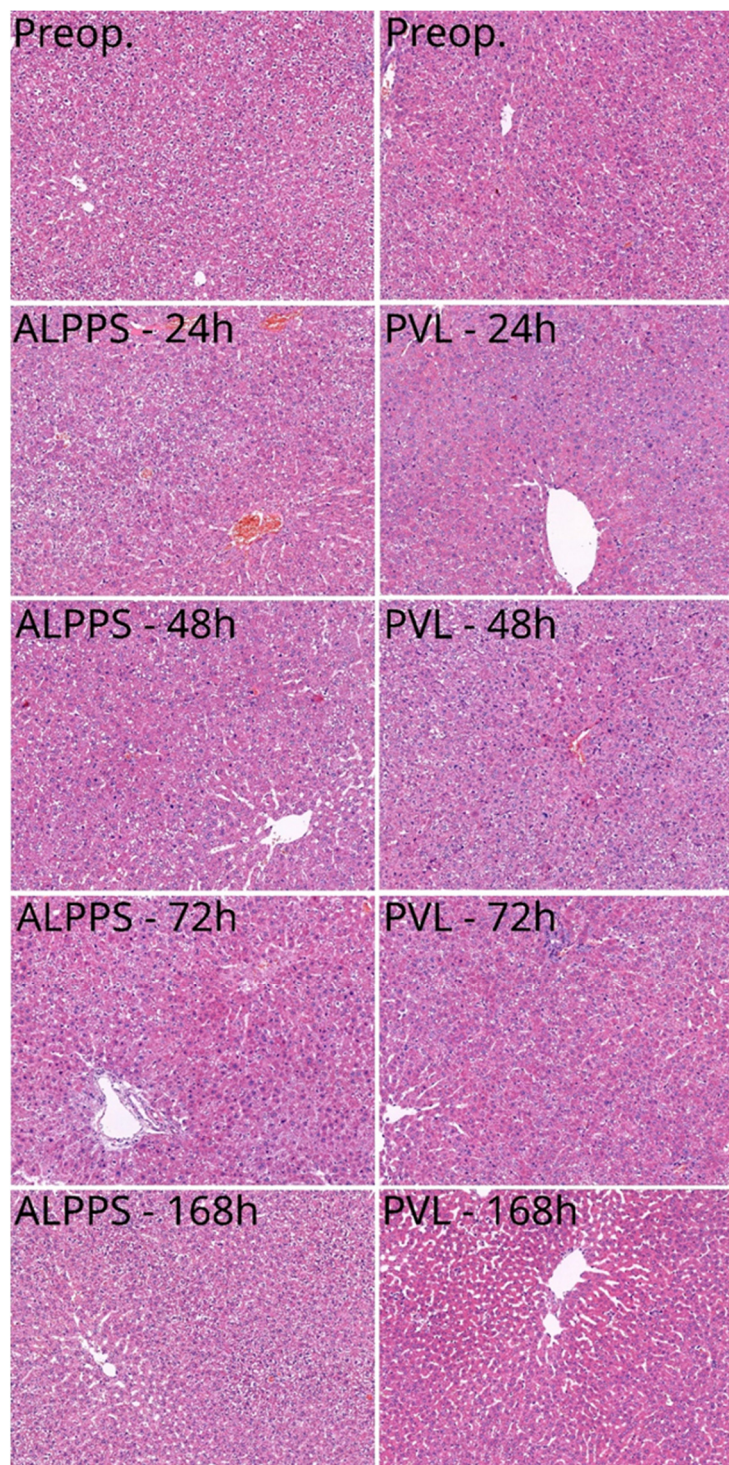

**Figure S2.** Histological structure of liver preoperatively and after the operation. Histological structure (hematoxylin and eosin stain; original magnification:  $\times 150$ ) of the regenerating right median (RM) lobe preoperatively (preop.) and at 24 h, 48 h, 72 h, and 168 h after associating liver partition and portal vein ligation for staged hepatectomy (ALPPS) and portal vein ligation (PVL).
